# Supplementary material for: Cercis: A Non-polyploid Genomic Relic Within the Generally Polyploid Legume Family
Source: PubMed Central journal article supplement (PMC6499179; doi:10.3389/fpls.2019.00345), 2019-04-11

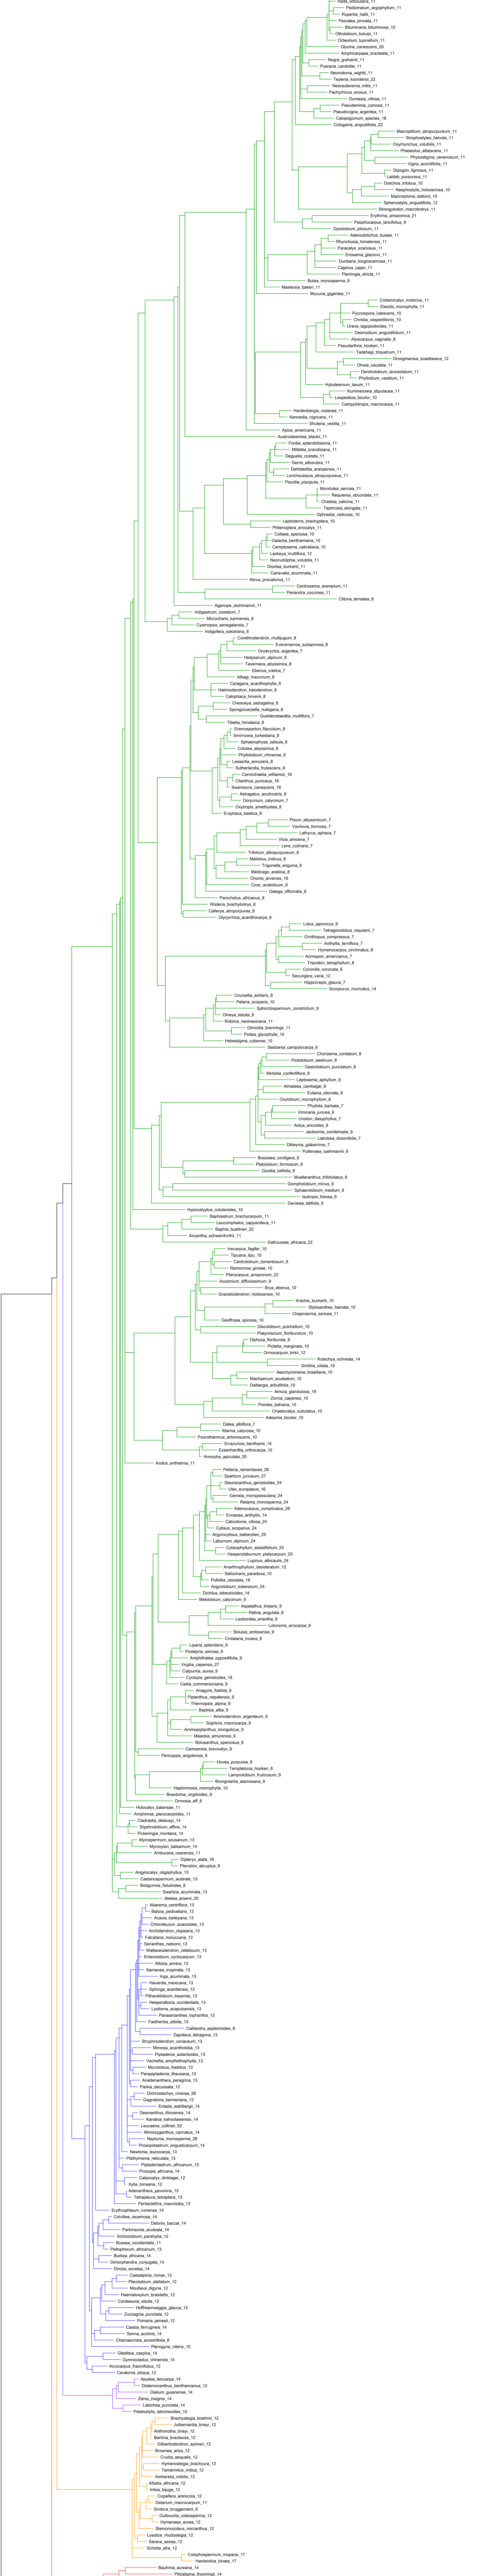

Supplement: Data_Sheet_6.pdf [file Data_Sheet_6.pdf]
