# Supplementary material for: Cercis: A Non-polyploid Genomic Relic Within the Generally Polyploid Legume Family
Source: Front Plant Sci. 2019 Apr 11;10:345. doi: 10.3389/fpls.2019.00345 (PMC6499179; doi:10.3389/fpls.2019.00345)
Supplement: TABLE S5 — Legume genome size estimates. [file Table_5.xlsx]

## Sheet: captions and notes
Frontiers name	Data Sheet name	Original name	Contents
Table 5.XLSX	Data Sheet SD12	ST05_legume_genome_sizes.xlsx	Legume genome size estimates.
Genome size data was accessed from:
http://data.kew.org/cvalues
on 2018-12-06
selecting on leguminosae
or on fabaceae

## Sheet: full
Genus	Species	1C (Mbp)	Original Reference	Paper	START	END	median	average
Acacia	tortilis	513	Bukhari, 1997 (Ref. 320)	2000	2	70
Acacia	caffra	538	Bukhari, 1997 (Ref. 320)	2000	2	70
Acacia	nilotica	538	Bukhari, 1997 (Ref. 320)	2000	2	70
Acacia	polycantha	538	Bukhari, 1997 (Ref. 320)	2000	2	70
Acacia	albida	562	Bukhari, 1997 (Ref. 320)	2000	2	70
Acacia	drepanolobium	562	Bukhari, 1997 (Ref. 320)	2000	2	70
Acacia	mellifera	587	Bukhari, 1997 (Ref. 320)	2000	2	70
Acacia	modesta	587	Ohri, 1996 (Ref. 301)	1997	2	70
Acacia	sieberana	587	Bukhari, 1997 (Ref. 320)	2000	2	70
Acacia	mangium	636	Blakesley et al., 2002 (Ref. 441)	2005a	2	70
Acacia	catechu	685	Ohri, 1996 (Ref. 301)	1997	2	70
Acacia	mearnsii	685	Bukhari, 1997 (Ref. 320)	2000	2	70
Acacia	tortilis	685	Ouarda et al., 2009 (Ref. 659)	2012	2	70
Acacia	constricta	709	Sliwinska et al., 2009 (Ref. 624)	2012	2	70
Acacia	melanoxylon	734	Bukhari, 1997 (Ref. 320)	2000	2	70
Acacia	colletioides	748	Morgan & Westoby, 2005 (Ref. 526)	2011	2	70
Acacia	heterophylla	782	Marie and Brown, 1993 (Ref. 290)	1997	2	70
Acacia	implexa	782	Bukhari, 1997 (Ref. 320)	2000	2	70
Acacia	doratoxylon	792	Morgan & Westoby, 2005 (Ref. 526)	2011	2	70
Acacia	wilhelmiana	792	Morgan & Westoby, 2005 (Ref. 526)	2011	2	70
Acacia	sophorae	807	Bukhari, 1997 (Ref. 320)	2000	2	70
Acacia	nubica	831	Bukhari, 1997 (Ref. 320)	2000	2	70
Acacia	smallii	841	Sliwinska et al., 2009 (Ref. 624)	2012	2	70
Acacia	dealbata	851	Blakesley et al., 2002 (Ref. 441)	2005a	2	70
Acacia	suaveolens	880	Morgan & Westoby, 2005 (Ref. 526)	2011	2	70
Acacia	oswaldii	895	Morgan & Westoby, 2005 (Ref. 526)	2011	2	70
Acacia	raddiana	929	Bukhari, 1997 (Ref. 320)	2000	2	70
Acacia	floribunda	939	Morgan & Westoby, 2005 (Ref. 526)	2011	2	70
Acacia	seyal	1051	Bukhari, 1997 (Ref. 320)	2000	2	70
Acacia	nilotica	1076	Bukhari, 1997 (Ref. 320)	2000	2	70
Acacia	tortilis	1076	Bukhari, 1997 (Ref. 320)	2000	2	70
Acacia	falciformis	1149	Mukherjee and Sharma, 1995 (Ref. 364)	2000	2	70
Acacia	nilotica	1174	Mukerjee and Sharma, 1993 (Ref. 289)	1997	2	70
Acacia	leptocarpa	1198	Mukherjee and Sharma, 1995 (Ref. 364)	2000	2	70
Acacia	dealbata	1237	Blakesley et al., 2002 (Ref. 441)	2005a	2	70
Acacia	verek	1271	Mukerjee and Sharma, 1993 (Ref. 289)	1997	2	70
Acacia	gerrardi	1296	Mukerjee and Sharma, 1993 (Ref. 289)	1997	2	70
Acacia	salicina	1296	Mukerjee and Sharma, 1993 (Ref. 289)	1997	2	70
Acacia	crassicarpa	1345	Mukherjee and Sharma, 1995 (Ref. 364)	2000	2	70
Acacia	bivenosa	1369	Mukerjee and Sharma, 1993 (Ref. 289)	1997	2	70
Acacia	hylonoma	1369	Mukherjee and Sharma, 1995 (Ref. 364)	2000	2	70
Acacia	bancrofti	1418	Mukherjee and Sharma, 1995 (Ref. 364)	2000	2	70
Acacia	crassa	1418	Mukherjee and Sharma, 1995 (Ref. 364)	2000	2	70
Acacia	farnesiana	1418	Mukerjee and Sharma, 1993 (Ref. 289)	1997	2	70
Acacia	maidenii	1418	Mukherjee and Sharma, 1995 (Ref. 364)	2000	2	70
Acacia	orites	1418	Mukherjee and Sharma, 1995 (Ref. 364)	2000	2	70
Acacia	aulacocarpa	1467	Mukherjee and Sharma, 1995 (Ref. 364)	2000	2	70
Acacia	falcata	1467	Mukherjee and Sharma, 1995 (Ref. 364)	2000	2	70
Acacia	senegal	1467	Mukerjee and Sharma, 1993 (Ref. 289)	1997	2	70
Acacia	concurrens	1491	Mukherjee and Sharma, 1995 (Ref. 364)	2000	2	70
Acacia	leiocalyx	1540	Mukherjee and Sharma, 1995 (Ref. 364)	2000	2	70
Acacia	heterophylla	1560	Coulaud et al., 1995 (Ref. 692)	2012	2	70
Acacia	ligulata	1589	Mukerjee and Sharma, 1993 (Ref. 289)	1997	2	70
Acacia	podalyriifolia	1614	Mukherjee and Sharma, 1995 (Ref. 364)	2000	2	70
Acacia	suberosa	1614	Mukerjee and Sharma, 1993 (Ref. 289)	1997	2	70
Acacia	leucophloea	1638	Mukerjee and Sharma, 1993 (Ref. 289)	1997	2	70
Acacia	dealbata	1667	Blakesley et al., 2002 (Ref. 441)	2005a	2	70
Acacia	holosericea	1712	Mukherjee and Sharma, 1995 (Ref. 364)	2000	2	70
Acacia	greggii	1736	Mukerjee and Sharma, 1993 (Ref. 289)	1997	2	70
Acacia	irrorata	1736	Mukherjee and Sharma, 1995 (Ref. 364)	2000	2	70
Acacia	pycnantha	1736	Mukherjee and Sharma, 1995 (Ref. 364)	2000	2	70
Acacia	fimbriata	1760	Mukherjee and Sharma, 1995 (Ref. 364)	2000	2	70
Acacia	longispicata	1834	Mukherjee and Sharma, 1995 (Ref. 364)	2000	2	70
Acacia	raddiana	1858	Mukerjee and Sharma, 1993 (Ref. 289)	1997	2	70
Acacia	cincinnata	1883	Mukherjee and Sharma, 1995 (Ref. 364)	2000	2	70
Acacia	iteaphylla	1883	Mukherjee and Sharma, 1995 (Ref. 364)	2000	2	70
Acacia	tortilis	2005	Mukerjee and Sharma, 1993 (Ref. 289)	1997	2	70
Acacia	victoriae	2005	Mukerjee and Sharma, 1993 (Ref. 289)	1997	2	70
Acacia	simsii	2054	Mukherjee and Sharma, 1995 (Ref. 364)	2000	2	70	1237	1193
Adenanthera	pavonina	665	Ohri, 2002 (Ref. 454)	2005a	71	72
Adenanthera	microsperma	680	Ohri, 2002 (Ref. 454)	2005a	71	72	672.5	673
Adenocarpus	viscosus	826	Suda et al., 2005 (Ref. 552)	2011	73	74
Adenocarpus	foliolosus	875	Suda et al., 2005 (Ref. 552)	2011	73	74	850.5	851
Albizzia	amara	1125	Ohri, 1996 (Ref. 301)	1997	75	76
Albizzia	lucida	1247	Ohri, 1996 (Ref. 301)	1997	75	76	1186	1186
Anthyllis	vulneraria	465	Grime and Mowforth, 1982 (Ref. 110)	1991	77	78
Anthyllis	montana	655	Siljak-Yakovlev et al., 2010 (Ref. 634)	2012	77	78	560	560
Arachis	duranensis	1240	Temsch and Greilhuber, 2001 (Ref. 396)	2005a	79	101
Arachis	sylvestris	1467	Singh et al., 1996 (Ref. 297)	1997	79	101
Arachis	triseminalis	1491	Singh et al., 1996 (Ref. 297)	1997	79	101
Arachis	villosulicarpa	1834	Singh et al., 1996 (Ref. 297)	1997	79	101
Arachis	pusilla	2054	Singh et al., 1996 (Ref. 297)	1997	79	101
Arachis	spegazinii	2445	Resslar et al., 1981 (Ref. 115)	1991	79	101
Arachis	batizocoi	2616	Singh et al., 1996 (Ref. 297)	1997	79	101
Arachis	ipaensis	2763	Singh et al., 1996 (Ref. 297)	1997	79	101
Arachis	hypogaea	2807	Temsch and Greilhuber, 2000 (Ref. 395)	2005a	79	101
Arachis	rigonii	2812	Singh et al., 1996 (Ref. 297)	1997	79	101
Arachis	monticola	2885	Temsch and Greilhuber, 2000 (Ref. 395)	2005a	79	101
Arachis	pintoi	2910	Singh et al., 1996 (Ref. 297)	1997	79	101
Arachis	appressipila	2934	Singh et al., 1996 (Ref. 297)	1997	79	101
Arachis	stenophylla	2958	Singh et al., 1996 (Ref. 297)	1997	79	101
Arachis	cardenasii	2983	Singh et al., 1996 (Ref. 297)	1997	79	101
Arachis	helodes	2983	Singh et al., 1996 (Ref. 297)	1997	79	101
Arachis	stenosperma	2983	Singh et al., 1996 (Ref. 297)	1997	79	101
Arachis	matiensis	3007	Singh et al., 1996 (Ref. 297)	1997	79	101
Arachis	chacoense	3105	Singh et al., 1996 (Ref. 297)	1997	79	101
Arachis	correntina	3130	Singh et al., 1996 (Ref. 297)	1997	79	101
Arachis	villosa	3203	Singh et al., 1996 (Ref. 297)	1997	79	101
Arachis	paraguariensis	3374	Singh et al., 1996 (Ref. 297)	1997	79	101
Arachis	glabrata	5697	Singh et al., 1996 (Ref. 297)	1997	79	101	2910	2769
Archidendron	monadelphum	1467	Ohri, 2002 (Ref. 454)	2005a	102	102	1467	1467
Argyrolobium	dalmaticum	1712	Siljak-Yakovlev et al., 2010 (Ref. 634)	2012	103	104
Argyrolobium	zanonii	2024	Siljak-Yakovlev et al., 2010 (Ref. 634)	2012	103	104	1868	1868
Astragalus	angustifolius	709	Siljak-Yakovlev et al., 2010 (Ref. 634)	2012	105	107
Astragalus	glycyphyllos	734	Temsch et al., 2010 (Ref. 627)	2012	105	107
Astragalus	vesicarius	1120	Siljak-Yakovlev et al., 2010 (Ref. 634)	2012	105	107	734	854
Bauhinia	blakeana	582	Ohri et al., 2004 (Ref. 501)	2011	108	113
Bauhinia	purpurea	587	Ohri and Kumar, 1986 (Ref. 185)	1995	108	113
Bauhinia	tomentosa	611	Ohri, 2002 (Ref. 454)	2005a	108	113
Bauhinia	hookeri	619	Ohri, 2002 (Ref. 454)	2005a	108	113
Bauhinia	galpinii	641	Ohri et al., 2004 (Ref. 501)	2011	108	113
Bauhinia	monandra	699	Ohri et al., 2004 (Ref. 501)	2011	108	113	615	623
Biserrula	pectinatus	416	Bennett and Smith, 1987 (Ref. 164)	1995	114	114	416	416
Bituminaria	bituminosa	488	Walker et al., 2006 (Ref. 513)	2011	115	115	488	488
Butea	monosperma	548	Ohri et al., 2004 (Ref. 501)	2011	116	116	548	548
Caesalpinia	coriaria	831	Ohri, 1996 (Ref. 301)	1997	117	119
Caesalpinia	pulcherrima	1760	Ohri et al., 2004 (Ref. 501)	2011	117	119
Caesalpinia	mexicana	1958	Ohri et al., 2004 (Ref. 501)	2011	117	119	1760	1516
Cajanus	mollis	802	Ohri and Singh, 2002 (Ref. 443)	2005a	120	130
Cajanus	cajan	856	Bennett and Smith, 1976 (Ref. 2)	1976	120	130
Cajanus	volubilis	1149	Ohri, 1996 (Ref. 303)	1997	120	130
Cajanus	albicans	1257	Ohri and Singh, 2002 (Ref. 443)	2005a	120	130
Cajanus	platycarpus	1271	Ohri, 1996 (Ref. 303)	1997	120	130
Cajanus	sericeus	1411	Ohri and Singh, 2002 (Ref. 443)	2005a	120	130
Cajanus	cajanifolius	1687	Ohri, 1996 (Ref. 303)	1997	120	130
Cajanus	lineatus	1785	Ohri, 1996 (Ref. 303)	1997	120	130
Cajanus	scarabaeoides	1834	Ohri, 1996 (Ref. 303)	1997	120	130
Cajanus	goensis	1980	Ohri, 1996 (Ref. 303)	1997	120	130
Cajanus	acutifolius	2861	Ohri, 1996 (Ref. 303)	1997	120	130	1411	1536
Caragana	arborescens	1565	Olszewska and Osiecka, 1984 (Ref. 157)	1991	131	131	1565	1565
Cassia	absus	636	Ohri et al., 1986 (Ref. 186)	1995	132	144
Cassia	occidentalis	660	Ohri et al., 1986 (Ref. 186)	1995	132	144
Cassia	tora	660	Ohri et al., 1986 (Ref. 186)	1995	132	144
Cassia	fistula	685	Ohri et al., 1986 (Ref. 186)	1995	132	144
Cassia	siamea	685	Ohri et al., 1986 (Ref. 186)	1995	132	144
Cassia	auriculata	709	Ohri et al., 1986 (Ref. 186)	1995	132	144
Cassia	australis	709	Ohri et al., 1986 (Ref. 186)	1995	132	144
Cassia	biflora	709	Ohri et al., 1986 (Ref. 186)	1995	132	144
Cassia	glauca	709	Ohri et al., 1986 (Ref. 186)	1995	132	144
Cassia	artemisioides	924	Sliwinska et al., 2009 (Ref. 624)	2012	132	144
Cassia	obtusifolia	978	Bennett et al., 1998 (Ref. 375)	2000	132	144
Cassia	excelsa	1247	Ohri et al., 1986 (Ref. 186)	1995	132	144
Cassia	angustifolia	1760	Bahl and Srivastava, 1987 (Ref. 236)	1995	132	144	709	852
Castanospermum	australe	553	Ohri, 2002 (Ref. 454)	2005a	145	145	553	553
Ceratonia	siliqua	636	Ouarda et al., 2008 (Ref. 654)	2012	146	146	636	636
Chamaecytisus	proliferus	1218	Suda et al., 2005 (Ref. 552)	2011	147	149
Chamaecytisus	hirsutus	2000	Siljak-Yakovlev et al., 2010 (Ref. 634)	2012	147	149
Chamaecytisus	spinescens	3120	Siljak-Yakovlev et al., 2010 (Ref. 634)	2012	147	149	2000	2113
Cicer	judaicum	905	Ohri and Pal, 1991 (Ref. 210)	1995	150	157
Cicer	arietinum	929	Bennett and Smith, 1976 (Ref. 2)	1976	150	157
Cicer	cuneatum	1223	Ohri and Pal, 1991 (Ref. 210)	1995	150	157
Cicer	bijugum	1247	Ohri and Pal, 1991 (Ref. 210)	1995	150	157
Cicer	pinnatifidum	1247	Ohri and Pal, 1991 (Ref. 210)	1995	150	157
Cicer	echinospermum	1271	Galasso et al., 1996 (Ref. 277)	1997	150	157
Cicer	reticulatum	1296	Galasso et al., 1996 (Ref. 277)	1997	150	157
Cicer	songaricum	1325	Ohri, 1999 (Ref. 435)	2005a	150	157	1247	1180
Colutea	arborescens	636	Olszewska and Osiecka, 1984 (Ref. 157)	1991	158	158	636	636
Coronilla	emerus	1188	Siljak-Yakovlev et al., 2010 (Ref. 634)	2012	159	159	1188	1188
Crotalaria	grahamiana	929	Gupta, 1976 (Ref. 65)	1982	160	172
Crotalaria	retusa	954	Gupta, 1976 (Ref. 65)	1982	160	172
Crotalaria	sericea	954	Gupta, 1976 (Ref. 65)	1982	160	172
Crotalaria	intermedia	978	Gupta, 1976 (Ref. 65)	1982	160	172
Crotalaria	brownei	1027	Gupta, 1976 (Ref. 65)	1982	160	172
Crotalaria	saltiana	1076	Gupta, 1976 (Ref. 65)	1982	160	172
Crotalaria	lanceolata	1100	Gupta, 1976 (Ref. 65)	1982	160	172
Crotalaria	striata	1174	Gupta, 1976 (Ref. 65)	1982	160	172
Crotalaria	juncea	1198	Gupta, 1976 (Ref. 65)	1982	160	172
Crotalaria	pallida	1223	Gupta, 1976 (Ref. 65)	1982	160	172
Crotalaria	verrucosa	1223	Gupta, 1976 (Ref. 65)	1982	160	172
Crotalaria	mucronata	1247	Gupta, 1976 (Ref. 65)	1982	160	172
Crotalaria	incana	1638	Gupta, 1976 (Ref. 65)	1982	160	172	1100	1132
Cytisus	nigricans	538	Olszewska and Osiecka, 1984 (Ref. 157)	1991	173	179
Cytisus	purpureus	831	Olszewska and Osiecka, 1984 (Ref. 157)	1991	173	179
Cytisus	scoparius	831	Mowforth, 1986 (Ref. 158)	1991	173	179
Cytisus	striatus	944	Horjales et al., 2003 (Ref. 489)	2011	173	179
Cytisus	heuffelii	1100	Siljak-Yakovlev et al., 2010 (Ref. 634)	2012	173	179
Cytisus	commutatus	1897	Horjales et al., 2003 (Ref. 489)	2011	173	179
Cytisus	ciliatus	2024	Siljak-Yakovlev et al., 2010 (Ref. 634)	2012	173	179	944	1166
Dalbergia	lanceolaria	1428	Hiramath et al., 2001 (Ref. 445)	2005a	180	189
Dalbergia	paniculata	1548	Hiramath et al., 2001 (Ref. 445)	2005a	180	189
Dalbergia	sissoo	1582	Hiramath et al., 2001 (Ref. 445)	2005a	180	189
Dalbergia	latifolia	1677	Hiramath et al., 2001 (Ref. 445)	2005a	180	189
Dalbergia	sissoides	1760	Hiramath et al., 2001 (Ref. 445)	2005a	180	189
Dalbergia	rubiginosa	1800	Hiramath et al., 2001 (Ref. 445)	2005a	180	189
Dalbergia	melanoxylon	1802	Hiramath et al., 2001 (Ref. 445)	2005a	180	189
Dalbergia	malabarica	1844	Hiramath et al., 2001 (Ref. 445)	2005a	180	189
Dalbergia	volubilis	1897	Hiramath et al., 2001 (Ref. 445)	2005a	180	189
Dalbergia	horrida	1924	Hiramath et al., 2001 (Ref. 445)	2005a	180	189	1780	1726
Dorycnium	pentaphyllum	1007	Siljak-Yakovlev et al., 2010 (Ref. 634)	2012	190	191
Dorycnium	eriophtalmum	1095	Suda et al., 2003 (Ref. 477)	2011	190	191	1051	1051
Dunbaria	ferruginea	1149	Ohri, 1996 (Ref. 303)	1997	192	192	1149	1149
Erythrina	stricta	990	Ohri et al., 2004 (Ref. 501)	2011	193	205
Erythrina	vespertilio	1095	Ohri et al., 2004 (Ref. 501)	2011	193	205
Erythrina	fusca	1100	Ohri et al., 2004 (Ref. 501)	2011	193	205
Erythrina	velutina	1203	Ohri et al., 2004 (Ref. 501)	2011	193	205
Erythrina	corallodendron	1281	Ohri et al., 2004 (Ref. 501)	2011	193	205
Erythrina	blakei	1308	Ohri et al., 2004 (Ref. 501)	2011	193	205
Erythrina	humeana	1377	Ohri et al., 2004 (Ref. 501)	2011	193	205
Erythrina	lysistemon	1391	Ohri et al., 2004 (Ref. 501)	2011	193	205
Erythrina	lithosperma	1450	Ohri et al., 2004 (Ref. 501)	2011	193	205
Erythrina	suberosa	1516	Ohri, 1996 (Ref. 301)	1997	193	205
Erythrina	variegata	1667	Ohri et al., 2004 (Ref. 501)	2011	193	205
Erythrina	caffra	1724	Ohri et al., 2004 (Ref. 501)	2011	193	205
Erythrina	resupinata	1731	Ohri et al., 2004 (Ref. 501)	2011	193	205	1377	1372
Eutaxia	microphylla	1584	Morgan & Westoby, 2005 (Ref. 526)	2011	206	206	1584	1584
Flemingia	strobilifera	1467	Ohri, 1996 (Ref. 303)	1997	207	209
Flemingia	bracteata	1567	Ohri and Singh, 2002 (Ref. 443)	2005a	207	209
Flemingia	macrophylla	1736	Ohri, 1996 (Ref. 303)	1997	207	209	1567	1590
Galega	officinalis	2161	Kubesová et al., 2010 (Ref. 630)	2012	210	210	2161	2161
Genista	januensis	836	Siljak-Yakovlev et al., 2010 (Ref. 634)	2012	211	216
Genista	radiata	954	Siljak-Yakovlev et al., 2010 (Ref. 634)	2012	211	216
Genista	pilosa	1012	Siljak-Yakovlev et al., 2010 (Ref. 634)	2012	211	216
Genista	ovata	1042	Siljak-Yakovlev et al., 2010 (Ref. 634)	2012	211	216
Genista	tinctoria	1633	Siljak-Yakovlev et al., 2010 (Ref. 634)	2012	211	216
Genista	benehoavensis	2249	Suda et al., 2005 (Ref. 552)	2011	211	216	1027	1288
Gleditsia	ferox	929	Ohri and Kumar, 1986 (Ref. 185)	1995	217	218
Gleditsia	sinensis	1027	Ohri and Kumar, 1986 (Ref. 185)	1995	217	218	978	978
Glycine	canescens	929	Hammatt et al., 1991 (Ref. 165)	1995	219	234
Glycine	microphylla	978	Hammatt et al., 1991 (Ref. 165)	1995	219	234
Glycine	tabacina	978	Hammatt et al., 1991 (Ref. 165)	1995	219	234
Glycine	latifolia	1051	Hammatt et al., 1991 (Ref. 165)	1995	219	234
Glycine	max	1100	Greilhuber and Obermayer, 1996 (Ref. 298)	1997	219	234
Glycine	tomentella	1100	Hammatt et al., 1991 (Ref. 165)	1995	219	234
Glycine	soja	1125	Hammatt et al., 1991 (Ref. 165)	1995	219	234
Glycine	arenaria	1174	Hammatt et al., 1991 (Ref. 165)	1995	219	234
Glycine	clandestina	1174	Hammatt et al., 1991 (Ref. 165)	1995	219	234
Glycine	argyrea	1247	Hammatt et al., 1991 (Ref. 165)	1995	219	234
Glycine	cyrtoloba	1296	Hammatt et al., 1991 (Ref. 165)	1995	219	234
Glycine	latrobeana	1320	Hammatt et al., 1991 (Ref. 165)	1995	219	234
Glycine	curvata	1467	Hammatt et al., 1991 (Ref. 165)	1995	219	234
Glycine	falcata	1614	Hammatt et al., 1991 (Ref. 165)	1995	219	234
Glycine	tabacina	1980	Hammatt et al., 1991 (Ref. 165)	1995	219	234
Glycine	tomentella	2078	Hammatt et al., 1991 (Ref. 165)	1995	219	234	1174	1288
Hedysarum	pycnostachyum	2274	Akpinar and Yildiz, 1999 (Ref. 363)	2000	235	240
Hedysarum	varium	2396	Akpinar and Yildiz, 1999 (Ref. 363)	2000	235	240
Hedysarum	nitidum	2641	Akpinar and Yildiz, 1999 (Ref. 363)	2000	235	240
Hedysarum	pestalozzae	2690	Akpinar and Yildiz, 1999 (Ref. 363)	2000	235	240
Hedysarum	aucheri	2763	Akpinar and Yildiz, 1999 (Ref. 363)	2000	235	240
Hedysarum	rotundifolium	3301	Akpinar and Yildiz, 1999 (Ref. 363)	2000	235	240	2665.5	2678
Hippocrepis	comosa	1861	Vidic et al., 2009 (Ref. 628)	2012	241	241	1861	1861
Inga	dulcis	401	Ohri, 2002 (Ref. 454)	2005a	242	242	401	401
Lablab	niger	367	Bennett and Smith, 1976 (Ref. 2)	1976	243	243	367	367
Laburnum	anagyroides	782	Olszewska and Osiecka, 1984 (Ref. 157)	1991	244	245
Laburnum	alpinum	1858	Olszewska and Osiecka, 1984 (Ref. 157)	1991	244	245	1320	1320
Lathyrus	miniatus	3350	Narayan, 1982 (Ref. 113)	1991	246	297
Lathyrus	angulatus	4377	Evans et al., 1972 (Ref. 7)	1976	246	297
Lathyrus	pratensis	4436	Vidic et al., 2009 (Ref. 628)	2012	246	297
Lathyrus	amphicarpos	4646	Bennett and Smith, 1976 (Ref. 2)	1976	246	297
Lathyrus	ciliolatus	4817	Callimassia and Bennett, 1992 (Ref. 269-H)	1995	246	297
Lathyrus	basalticus	4988	Nandini et al., 1997 (Ref. 319)	2000	246	297
Lathyrus	setifolius	5061	Bennett and Smith, 1976 (Ref. 2)	1976	246	297
Lathyrus	inconspicuus	5086	Bennett and Smith, 1976 (Ref. 2)	1976	246	297
Lathyrus	vernus	5123	Vesely et al., 2011 (Ref. 675)	2012	246	297
Lathyrus	gorgoni	5624	Nandini et al., 1997 (Ref. 319)	2000	246	297
Lathyrus	venetus	5677	Vesely et al., 2011 (Ref. 675)	2012	246	297
Lathyrus	pratensis	5820	Temsch et al., 2010 (Ref. 627)	2012	246	297
Lathyrus	aureus	5844	Vesely et al., 2011 (Ref. 675)	2012	246	297
Lathyrus	clymenum	5868	Bennett and Smith, 1976 (Ref. 2)	1976	246	297
Lathyrus	armenius	5892	Callimassia and Bennett, 1992 (Ref. 269-H)	1995	246	297
Lathyrus	pseudo-cicera	5917	Nandini et al., 1997 (Ref. 319)	2000	246	297
Lathyrus	articulatus	5941	Narayan, 1982 (Ref. 113)	1991	246	297
Lathyrus	incurvus	5941	Callimassia and Bennett, 1992 (Ref. 269-H)	1995	246	297
Lathyrus	nissolia	6308	Narayan, 1982 (Ref. 113)	1991	246	297
Lathyrus	chloranthus	6357	Nandini et al., 1997 (Ref. 319)	2000	246	297
Lathyrus	hirticarpus	6406	Nandini et al., 1997 (Ref. 319)	2000	246	297
Lathyrus	maritimus	6430	Narayan, 1982 (Ref. 113)	1991	246	297
Lathyrus	blepharicarpus	6504	Nandini et al., 1997 (Ref. 319)	2000	246	297
Lathyrus	ochrus	6675	Narayan, 1982 (Ref. 113)	1991	246	297
Lathyrus	sphaericus	6699	Rees and Hazarika, 1969 (Ref. 15)	1976	246	297
Lathyrus	aphaca	6748	Rees and Hazarika, 1969 (Ref. 15)	1976	246	297
Lathyrus	cicera	6846	Rees and Hazarika, 1969 (Ref. 15)	1976	246	297
Lathyrus	hierosolymitanus	6846	Nandini et al., 1997 (Ref. 319)	2000	246	297
Lathyrus	annuus	7066	Rees and Hazarika, 1969 (Ref. 15)	1976	246	297
Lathyrus	cassius	7359	Callimassia and Bennett, 1992 (Ref. 269-H)	1995	246	297
Lathyrus	spathulatus	7408	Callimassia and Bennett, 1992 (Ref. 269-H)	1995	246	297
Lathyrus	belinensis	7482	Nandini et al., 1997 (Ref. 319)	2000	246	297
Lathyrus	odoratus	7604	Murray et al., 1992 (Ref. 211)	1995	246	297
Lathyrus	mulkak	7628	Nandini et al., 1997 (Ref. 319)	2000	246	297
Lathyrus	digitatus	8093	Callimassia and Bennett, 1992 (Ref. 269-H)	1995	246	297
Lathyrus	montanus	8093	Rees and Hazarika, 1969 (Ref. 15)	1976	246	297
Lathyrus	niger	8093	Rees and Hazarika, 1969 (Ref. 15)	1976	246	297
Lathyrus	sativus	8215	Narayan, 1982 (Ref. 113)	1991	246	297
Lathyrus	gmelinii	8773	Unal et al., 1995 (Ref. 412)	2005a	246	297
Lathyrus	tingitanus	8851	Evans et al., 1972 (Ref. 7)	1976	246	297
Lathyrus	heterophyllus	8998	Nandini et al., 1997 (Ref. 319)	2000	246	297
Lathyrus	grandiflorus	9047	Nandini et al., 1997 (Ref. 319)	2000	246	297
Lathyrus	tuberosus	9095	Rees and Hazarika, 1969 (Ref. 15)	1976	246	297
Lathyrus	laxiflorus	9364	Callimassia and Bennett, 1992 (Ref. 269-H)	1995	246	297
Lathyrus	hirsutus	9756	Narayan, 1982 (Ref. 113)	1991	246	297
Lathyrus	giganteus	9829	Nandini et al., 1997 (Ref. 319)	2000	246	297
Lathyrus	chrysanthus	10293	Callimassia and Bennett, 1992 (Ref. 269-H)	1995	246	297
Lathyrus	latifolius	10636	Rees and Hazarika, 1969 (Ref. 15)	1976	246	297
Lathyrus	cirrhosus	10709	Nandini et al., 1997 (Ref. 319)	2000	246	297
Lathyrus	laevigatus	10985	Unal et al., 1995 (Ref. 412)	2005a	246	297
Lathyrus	sylvestris	11223	Rees and Hazarika, 1969 (Ref. 15)	1976	246	297
Lathyrus	vestitus	14279	Narayan, 1982 (Ref. 113)	1991	246	297	6797	7291
Lens	culinaris	4108	Arumuganathan and Earle, 1991 (Ref. 227)	1995	298	299
Lens	esculenta	4499	Bennett and Smith, 1976 (Ref. 2)	1976	298	299	4303.5	4304
Leucaena	macrophylla	298	Hartman et al., 2000 (Ref. 425)	2005a	300	323
Leucaena	lempirana	425	Hartman et al., 2000 (Ref. 425)	2005a	300	323
Leucaena	multicapitula	469	Hartman et al., 2000 (Ref. 425)	2005a	300	323
Leucaena	pueblana	489	Hartman et al., 2000 (Ref. 425)	2005a	300	323
Leucaena	magnifica	499	Hartman et al., 2000 (Ref. 425)	2005a	300	323
Leucaena	matudae	518	Hartman et al., 2000 (Ref. 425)	2005a	300	323
Leucaena	collinsii	528	Hartman et al., 2000 (Ref. 425)	2005a	300	323
Leucaena	trichodes	538	Hartman et al., 2000 (Ref. 425)	2005a	300	323
Leucaena	esculenta	636	Palomino et al., 1995 (Ref. 278)	1997	300	323
Leucaena	cuspidata	685	Hartman et al., 2000 (Ref. 425)	2005a	300	323
Leucaena	pulverulenta	685	Hartman et al., 2000 (Ref. 425)	2005a	300	323
Leucaena	shannonii	689	Hartman et al., 2000 (Ref. 425)	2005a	300	323
Leucaena	lanceolata	709	Palomino et al., 1995 (Ref. 278)	1997	300	323
Leucaena	diversifolia	734	Palomino et al., 1995 (Ref. 278)	1997	300	323
Leucaena	retusa	763	Hartman et al., 2000 (Ref. 425)	2005a	300	323
Leucaena	trichandra	763	Hartman et al., 2000 (Ref. 425)	2005a	300	323
Leucaena	pallida	773	Hartman et al., 2000 (Ref. 425)	2005a	300	323
Leucaena	greggii	885	Hartman et al., 2000 (Ref. 425)	2005a	300	323
Leucaena	salvadorensis	885	Hartman et al., 2000 (Ref. 425)	2005a	300	323
Leucaena	involucrata	1120	Hartman et al., 2000 (Ref. 425)	2005a	300	323
Leucaena	esculenta	1247	Palomino et al., 1995 (Ref. 278)	1997	300	323
Leucaena	leucocephala	1247	Ohri and Kumar, 1986 (Ref. 185)	1995	300	323
Leucaena	diversifolia	1325	Hartman et al., 2000 (Ref. 425)	2005a	300	323
Leucaena	confertiflora	1614	Palomino et al., 1995 (Ref. 278)	1997	300	323	699	772
Lonchocarpus	angusticarpus	489	Palomino and Sousa, 2000 (Ref. 327)	2000	324	369
Lonchocarpus	atropurpureus	513	Palomino and Sousa, 2000 (Ref. 327)	2000	324	369
Lonchocarpus	castilloi	513	Palomino and Sousa, 2000 (Ref. 327)	2000	324	369
Lonchocarpus	emarginatus	513	Palomino and Sousa, 2000 (Ref. 327)	2000	324	369
Lonchocarpus	luteomaculatus	513	Palomino and Sousa, 2000 (Ref. 327)	2000	324	369
Lonchocarpus	mutans	513	Palomino and Sousa, 2000 (Ref. 327)	2000	324	369
Lonchocarpus	obovatus	513	Palomino and Sousa, 2000 (Ref. 327)	2000	324	369
Lonchocarpus	peninsularis	513	Palomino and Sousa, 2000 (Ref. 327)	2000	324	369
Lonchocarpus	phlebophyllus	513	Palomino and Sousa, 2000 (Ref. 327)	2000	324	369
Lonchocarpus	santarosanus	513	Palomino and Sousa, 2000 (Ref. 327)	2000	324	369
Lonchocarpus	spectabilis	513	Palomino and Sousa, 2000 (Ref. 327)	2000	324	369
Lonchocarpus	chiangii	538	Palomino and Sousa, 2000 (Ref. 327)	2000	324	369
Lonchocarpus	molinae	538	Palomino and Sousa, 2000 (Ref. 327)	2000	324	369
Lonchocarpus	punctatus	538	Palomino and Sousa, 2000 (Ref. 327)	2000	324	369
Lonchocarpus	rugosus	538	Palomino and Sousa, 2000 (Ref. 327)	2000	324	369
Lonchocarpus	chavelasii	562	Palomino and Sousa, 2000 (Ref. 327)	2000	324	369
Lonchocarpus	constrictus	562	Palomino and Sousa, 2000 (Ref. 327)	2000	324	369
Lonchocarpus	hermannii	562	Palomino and Sousa, 2000 (Ref. 327)	2000	324	369
Lonchocarpus	minimiflorus	562	Palomino and Sousa, 2000 (Ref. 327)	2000	324	369
Lonchocarpus	parviflorus	562	Palomino and Sousa, 2000 (Ref. 327)	2000	324	369
Lonchocarpus	phaseolifolius	562	Palomino and Sousa, 2000 (Ref. 327)	2000	324	369
Lonchocarpus	cruentus	587	Palomino and Sousa, 2000 (Ref. 327)	2000	324	369
Lonchocarpus	eriocarinalis	587	Palomino and Sousa, 2000 (Ref. 327)	2000	324	369
Lonchocarpus	guatemalensis	587	Palomino and Sousa, 2000 (Ref. 327)	2000	324	369
Lonchocarpus	hidalgensis	587	Palomino and Sousa, 2000 (Ref. 327)	2000	324	369
Lonchocarpus	hughesii	587	Palomino and Sousa, 2000 (Ref. 327)	2000	324	369
Lonchocarpus	martinezii	587	Palomino and Sousa, 2000 (Ref. 327)	2000	324	369
Lonchocarpus	schiedeanus	587	Palomino and Sousa, 2000 (Ref. 327)	2000	324	369
Lonchocarpus	agyrotrichus	611	Palomino and Sousa, 2000 (Ref. 327)	2000	324	369
Lonchocarpus	andrieuxii	611	Palomino and Sousa, 2000 (Ref. 327)	2000	324	369
Lonchocarpus	balsensis	611	Palomino and Sousa, 2000 (Ref. 327)	2000	324	369
Lonchocarpus	eriophyllus	611	Palomino and Sousa, 2000 (Ref. 327)	2000	324	369
Lonchocarpus	torresiorum	611	Palomino and Sousa, 2000 (Ref. 327)	2000	324	369
Lonchocarpus	acuminatus	636	Palomino and Sousa, 2000 (Ref. 327)	2000	324	369
Lonchocarpus	hintonii	636	Palomino and Sousa, 2000 (Ref. 327)	2000	324	369
Lonchocarpus	macrocarpus	636	Palomino and Sousa, 2000 (Ref. 327)	2000	324	369
Lonchocarpus	morenoi	636	Palomino and Sousa, 2000 (Ref. 327)	2000	324	369
Lonchocarpus	caudatus	660	Palomino and Sousa, 2000 (Ref. 327)	2000	324	369
Lonchocarpus	epigaeus	660	Palomino and Sousa, 2000 (Ref. 327)	2000	324	369
Lonchocarpus	lanceolatus	660	Palomino and Sousa, 2000 (Ref. 327)	2000	324	369
Lonchocarpus	schubertiae	660	Palomino and Sousa, 2000 (Ref. 327)	2000	324	369
Lonchocarpus	huetamoensis	685	Palomino and Sousa, 2000 (Ref. 327)	2000	324	369
Lonchocarpus	longipedunculatus	685	Palomino and Sousa, 2000 (Ref. 327)	2000	324	369
Lonchocarpus	salvadorensis	685	Palomino and Sousa, 2000 (Ref. 327)	2000	324	369
Lonchocarpus	sanctuari	685	Palomino and Sousa, 2000 (Ref. 327)	2000	324	369
Lonchocarpus	xuul	709	Palomino and Sousa, 2000 (Ref. 327)	2000	324	369	587	586
Lotus	coimbrensis	440	Cheng and Grant, 1973 (Ref. 38)	1976	370	395
Lotus	alpinus	465	Borsos, 1973 (Ref. 51)	1976	370	395
Lotus	corniculatus	465	Cheng and Grant, 1973 (Ref. 38)	1976	370	395
Lotus	japonicus	465	Cheng and Grant, 1973 (Ref. 38)	1976	370	395
Lotus	tenuis	465	Cheng and Grant, 1973 (Ref. 38)	1976	370	395
Lotus	borbasii	489	Cheng and Grant, 1973 (Ref. 38)	1976	370	395
Lotus	filicaulis	489	Cheng and Grant, 1973 (Ref. 38)	1976	370	395
Lotus	schoelleri	489	Cheng and Grant, 1973 (Ref. 38)	1976	370	395
Lotus	burttii	513	Borsos, 1973 (Ref. 51)	1976	370	395
Lotus	krylovii	513	Cheng and Grant, 1973 (Ref. 38)	1976	370	395
Lotus	pedunculatus	538	Cheng and Grant, 1973 (Ref. 38)	1976	370	395
Lotus	uliginosus	538	Grime and Mowforth, 1982 (Ref. 110)	1991	370	395
Lotus	dumetorum	597	Suda et al., 2003 (Ref. 477)	2011	370	395
Lotus	campylocladus	606	Suda et al., 2003 (Ref. 477)	2011	370	395
Lotus	glaucus	606	Suda et al., 2005 (Ref. 552)	2011	370	395
Lotus	palustris	734	Borsos, 1973 (Ref. 51)	1976	370	395
Lotus	corniculatus	1027	Bennett and Smith, 1976 (Ref. 2)	1976	370	395
Lotus	edulis	1076	Borsos, 1973 (Ref. 51)	1976	370	395
Lotus	arenarius	1100	Borsos, 1973 (Ref. 51)	1976	370	395
Lotus	berthelotii	1193	Suda et al., 2005 (Ref. 552)	2011	370	395
Lotus	glaucus	1213	Suda et al., 2003 (Ref. 477)	2011	370	395
Lotus	mascaënsis	1218	Suda et al., 2005 (Ref. 552)	2011	370	395
Lotus	sessilifolius	1232	Suda et al., 2005 (Ref. 552)	2011	370	395
Lotus	ornithopoides	1271	Borsos, 1973 (Ref. 51)	1976	370	395
Lotus	requienii	1296	Borsos, 1973 (Ref. 51)	1976	370	395
Lotus	cytisoides	1369	Borsos, 1973 (Ref. 51)	1976	370	395	601.5	785
Lupinus	princei	474	Naganowska et al., 2003 (Ref. 520)	2011	396	443
Lupinus	micranthus	479	Naganowska et al., 2003 (Ref. 520)	2011	396	443
Lupinus	pusillus	528	Naganowska et al., 2006 (Ref. 524)	2011	396	443
Lupinus	nanus	533	Naganowska et al., 2006 (Ref. 524)	2011	396	443
Lupinus	concinnus	553	Naganowska et al., 2006 (Ref. 524)	2011	396	443
Lupinus	graecus	553	Naganowska et al., 2003 (Ref. 520)	2011	396	443
Lupinus	microcarpus	557	Naganowska et al., 2006 (Ref. 524)	2011	396	443
Lupinus	termis	557	Naganowska et al., 2003 (Ref. 520)	2011	396	443
Lupinus	vavilovi	557	Naganowska et al., 2003 (Ref. 520)	2011	396	443
Lupinus	luteolus	572	Naganowska et al., 2006 (Ref. 524)	2011	396	443
Lupinus	albus	587	Bennett and Smith, 1976 (Ref. 2)	1976	396	443
Lupinus	anatolicus	587	Obermayer et al., 1999 (Ref. 369)	2000	396	443
Lupinus	pilosus	611	Obermayer et al., 1999 (Ref. 369)	2000	396	443
Lupinus	arizonicus	621	Naganowska et al., 2006 (Ref. 524)	2011	396	443
Lupinus	digitatus	670	Naganowska et al., 2003 (Ref. 520)	2011	396	443
Lupinus	bandelierae	675	Naganowska et al., 2006 (Ref. 524)	2011	396	443
Lupinus	arbustus	680	Naganowska et al., 2006 (Ref. 524)	2011	396	443
Lupinus	argenteus	680	Naganowska et al., 2006 (Ref. 524)	2011	396	443
Lupinus	palaestinus	680	Naganowska et al., 2003 (Ref. 520)	2011	396	443
Lupinus	garfieldensis	689	Naganowska et al., 2006 (Ref. 524)	2011	396	443
Lupinus	cosentinii	694	Naganowska et al., 2003 (Ref. 520)	2011	396	443
Lupinus	leucophyllus	694	Naganowska et al., 2006 (Ref. 524)	2011	396	443
Lupinus	linearis	694	Naganowska et al., 2006 (Ref. 524)	2011	396	443
Lupinus	sericeus	704	Naganowska et al., 2006 (Ref. 524)	2011	396	443
Lupinus	albifrons	724	Naganowska et al., 2006 (Ref. 524)	2011	396	443
Lupinus	bracteolaris	758	Naganowska et al., 2006 (Ref. 524)	2011	396	443
Lupinus	atlanticus	787	Naganowska et al., 2003 (Ref. 520)	2011	396	443
Lupinus	variicolor	817	Naganowska et al., 2006 (Ref. 524)	2011	396	443
Lupinus	lepidus	826	Naganowska et al., 2006 (Ref. 524)	2011	396	443
Lupinus	polyphyllus	831	Naganowska et al., 2006 (Ref. 524)	2011	396	443
Lupinus	guaraniticus	846	Naganowska et al., 2006 (Ref. 524)	2011	396	443
Lupinus	latifolius	851	Naganowska et al., 2006 (Ref. 524)	2011	396	443
Lupinus	rivularis	861	Naganowska et al., 2006 (Ref. 524)	2011	396	443
Lupinus	arboreus	880	Bennett and Smith, 1976 (Ref. 2)	1976	396	443
Lupinus	semperflorens	880	Naganowska et al., 2006 (Ref. 524)	2011	396	443
Lupinus	lanatus	885	Naganowska et al., 2006 (Ref. 524)	2011	396	443
Lupinus	angustifolius	905	Barlow, 1981 (Ref. 58)	1982	396	443
Lupinus	cryptanthus	910	Naganowska et al., 2003 (Ref. 520)	2011	396	443
Lupinus	multiflorus	910	Naganowska et al., 2006 (Ref. 524)	2011	396	443
Lupinus	magnistipulatus	914	Naganowska et al., 2006 (Ref. 524)	2011	396	443
Lupinus	linifolius	919	Naganowska et al., 2003 (Ref. 520)	2011	396	443
Lupinus	mutabilis	929	Naganowska et al., 2003 (Ref. 520)	2011	396	443
Lupinus	reitzii	934	Naganowska et al., 2006 (Ref. 524)	2011	396	443
Lupinus	luteus	978	Bennett and Smith, 1976 (Ref. 2)	1976	396	443
Lupinus	mexicanus	978	Naganowska et al., 2006 (Ref. 524)	2011	396	443
Lupinus	hispanicus	1027	Obermayer et al., 1999 (Ref. 369)	2000	396	443
Lupinus	texensis	1193	Price et al., 2005 (Ref. 511)	2011	396	443
Lupinus	albicaulis	1311	Naganowska et al., 2006 (Ref. 524)	2011	396	443	714	760
Medicago	truncatula	465	Arumuganathan and Earle, 1991 (Ref. 227)	1995	444	451
Medicago	quasifalcata	831	Marie and Brown, 1993 (Ref. 290)	1997	444	451
Medicago	sativa	841	Blondon et al., 1994 (Ref. 611)	2011	444	451
Medicago	lupulina	856	Mowforth, 1986 (Ref. 158)	1991	444	451
Medicago	coerulea	880	Marie and Brown, 1993 (Ref. 290)	1997	444	451
Medicago	sativa	1712	Bennett, 1972 (Ref. 1)	1976	444	451
Medicago	arborea	1760	Bennett, 1972 (Ref. 1)	1976	444	451
Medicago	glutinosa	1907	Bennett, 1972 (Ref. 1)	1976	444	451	868	1157
Melilotus	officinalis	1100	Arumuganathan and Earle, 1991 (Ref. 227)	1995	452	454
Melilotus	altissima	1198	Grime and Mowforth, 1982 (Ref. 110)	1991	452	454
Melilotus	alba	1296	Kenton and Bennett, 1990 (Ref. 269-G)	1995	452	454	1198	1198
Millettia	tetraptera	1731	Ohri et al., 2004 (Ref. 501)	2011	455	456
Millettia	ovalifolia	1956	Ohri and Kumar, 1986 (Ref. 185)	1995	455	456	1843.5	1844
Mimosa	pudica	587	Bennett et al., 1998 (Ref. 375)	2000	457	458
Mimosa	invisa	660	Bennett et al., 1998 (Ref. 375)	2000	457	458	623.5	624
Olneya	tesota	958	Sliwinska et al., 2009 (Ref. 624)	2012	459	459	958	958
Onobrychis	viciifolia	1223	Hayot C., 2010 (Ref. 656)	2012	460	460	1223	1223
Oxytropis	halleri	4509	Siljak-Yakovlev et al., 2010 (Ref. 634)	2012	461	461	4509	4509
Paracalyx	scariosa	1467	Ohri, 1996 (Ref. 303)	1997	462	462	1467	1467
Parkinsonia	aculeata	709	Ohri, 1996 (Ref. 301)	1997	463	463	709	709
Peltophorum	pterocarpum	775	Ohri, 2002 (Ref. 454)	2005a	464	464	775	775
Petteria	ramentacea	973	Siljak-Yakovlev et al., 2010 (Ref. 634)	2012	465	465	973	973
Phaseolus	macvaughii	440	Mercado-Ruaro and Kenton, 1993 (Ref. 269-K)	1995	466	501
Phaseolus	microcarpus	504	Nagl and Treviranus, 1995 (Ref. 390)	2005a	466	501
Phaseolus	leptostachyus	513	Mercado-Ruaro and Kenton, 1993 (Ref. 269-K)	1995	466	501
Phaseolus	oligospermus	513	Mercado-Ruaro and Kenton, 1993 (Ref. 269-K)	1995	466	501
Phaseolus	augustii	562	Mercado-Ruaro and Kenton, 1993 (Ref. 269-K)	1995	466	501
Phaseolus	filiformis	562	Mercado-Ruaro and Kenton, 1993 (Ref. 269-K)	1995	466	501
Phaseolus	pedicellatus	562	Mercado-Ruaro and Kenton, 1993 (Ref. 269-K)	1995	466	501
Phaseolus	esperanzae	587	Mercado-Ruaro and Kenton, 1993 (Ref. 269-K)	1995	466	501
Phaseolus	micranthus	587	Nagl and Treviranus, 1995 (Ref. 390)	2005a	466	501
Phaseolus	sonorensis	587	Mercado-Ruaro and Kenton, 1993 (Ref. 269-K)	1995	466	501
Phaseolus	vulgaris	587	Mercado-Ruaro and Kenton, 1993 (Ref. 269-K)	1995	466	501
Phaseolus	xanthotrichus	587	Mercado-Ruaro and Kenton, 1993 (Ref. 269-K)	1995	466	501
Phaseolus	leptostachys	611	Nagl and Treviranus, 1995 (Ref. 390)	2005a	466	501
Phaseolus	pachyrrhizoides	611	Mercado-Ruaro and Kenton, 1993 (Ref. 269-K)	1995	466	501
Phaseolus	macrolepis	636	Mercado-Ruaro and Kenton, 1993 (Ref. 269-K)	1995	466	501
Phaseolus	maculatus	636	Mercado-Ruaro and Kenton, 1993 (Ref. 269-K)	1995	466	501
Phaseolus	parviflorus	636	Nagl and Treviranus, 1995 (Ref. 390)	2005a	466	501
Phaseolus	angustissimus	645	Nagl and Treviranus, 1995 (Ref. 390)	2005a	466	501
Phaseolus	coccineus	660	Mercado-Ruaro and Kenton, 1993 (Ref. 269-K)	1995	466	501
Phaseolus	hintonii	660	Mercado-Ruaro and Kenton, 1993 (Ref. 269-K)	1995	466	501
Phaseolus	jaliscanus	660	Mercado-Ruaro and Kenton, 1993 (Ref. 269-K)	1995	466	501
Phaseolus	xolocotzii	660	Mercado-Ruaro and Kenton, 1993 (Ref. 269-K)	1995	466	501
Phaseolus	lunatus	685	Mercado-Ruaro and Kenton, 1993 (Ref. 269-K)	1995	466	501
Phaseolus	neglectus	685	Mercado-Ruaro and Kenton, 1993 (Ref. 269-K)	1995	466	501
Phaseolus	marechalii	709	Mercado-Ruaro and Kenton, 1993 (Ref. 269-K)	1995	466	501
Phaseolus	pauciflorus	709	Mercado-Ruaro and Kenton, 1993 (Ref. 269-K)	1995	466	501
Phaseolus	polyanthus	709	Mercado-Ruaro and Kenton, 1993 (Ref. 269-K)	1995	466	501
Phaseolus	acutifolius	734	Mercado-Ruaro and Kenton, 1993 (Ref. 269-K)	1995	466	501
Phaseolus	glabellus	880	Mercado-Ruaro and Kenton, 1993 (Ref. 269-K)	1995	466	501
Phaseolus	grayanus	929	Nagl and Treviranus, 1995 (Ref. 390)	2005a	466	501
Phaseolus	pluriflorus	929	Mercado-Ruaro and Kenton, 1993 (Ref. 269-K)	1995	466	501
Phaseolus	lathyroides	1125	Ayonoadu, 1974 (Ref. 28)	1976	466	501
Phaseolus	geophillus	1271	Ayonoadu, 1974 (Ref. 28)	1976	466	501
Phaseolus	angularis	1369	Ayonoadu, 1974 (Ref. 28)	1976	466	501
Phaseolus	leucanthus	1614	Ayonoadu, 1974 (Ref. 28)	1976	466	501
Phaseolus	dumosus	1858	Ayonoadu, 1974 (Ref. 28)	1976	466	501	652.5	756
Phyllota	phylicoides	914	Morgan & Westoby, 2005 (Ref. 526)	2011	502	502	914	914
Pisum	elatius	4328	Baranyi and Greilhuber, 1996 (Ref. 305)	1997	503	507
Pisum	humile	4328	Baranyi and Greilhuber, 1996 (Ref. 305)	1997	503	507
Pisum	fulvum	4597	Baranyi and Greilhuber, 1996 (Ref. 305)	1997	503	507
Pisum	abyssinicum	4621	Baranyi and Greilhuber, 1996 (Ref. 305)	1997	503	507
Pisum	sativum	4768	Bennett and Smith, 1976 (Ref. 2)	1976	503	507	4597	4528
Pongamia	glabra	1760	Ohri and Kumar, 1986 (Ref. 185)	1995	508	508	1760	1760
Prosopis	flexusa	391	Bukhari, 1997 (Ref. 320)	2000	509	520
Prosopis	alba	416	Bukhari, 1997 (Ref. 320)	2000	509	520
Prosopis	chilensis	416	Bukhari, 1997 (Ref. 320)	2000	509	520
Prosopis	glandulosa	416	Bukhari, 1997 (Ref. 320)	2000	509	520
Prosopis	juliflora	416	Bukhari, 1997 (Ref. 320)	2000	509	520
Prosopis	lampa	416	Bukhari, 1997 (Ref. 320)	2000	509	520
Prosopis	pallida	416	Bukhari, 1997 (Ref. 320)	2000	509	520
Prosopis	velutina	421	Sliwinska et al., 2009 (Ref. 624)	2012	509	520
Prosopis	siliquas	489	Bukhari, 1997 (Ref. 320)	2000	509	520
Prosopis	chilensis	831	Bukhari, 1997 (Ref. 320)	2000	509	520
Prosopis	cineraria	1249	Ohri, 2002 (Ref. 454)	2005a	509	520
Prosopis	juliflora	1663	Ohri, 1996 (Ref. 301)	1997	509	520	416	628
Psophocarpus	tetragonolobus	782	Bennett and Smith, 1976 (Ref. 2)	1976	521	521	782	782
Pterospartum	tridentatum	2269	Loureiro et al., 2007 (Ref. 563)	2011	522	522	2269	2269
Pueraria	lobata	1076	Price, 1999 (Ref. 347)	2000	523	523	1076	1076
Pultenaea	daphnoides	699	Morgan & Westoby, 2005 (Ref. 526)	2011	524	525
Pultenaea	flexilis	2518	Morgan & Westoby, 2005 (Ref. 526)	2011	524	525	1608.5	1609
Retama	sphaerocarpa	880	Benmiloud-Mahieddine et al., 2011 (Ref. 671)	2012	526	529
Retama	monosperma	924	Benmiloud-Mahieddine et al., 2011 (Ref. 671)	2012	526	529
Retama	raetam	929	Benmiloud-Mahieddine et al., 2011 (Ref. 671)	2012	526	529
Retama	raetam	1795	Benmiloud-Mahieddine et al., 2011 (Ref. 671)	2012	526	529	926.5	1132
Rhynchosia	aurea	1198	Ohri, 1996 (Ref. 303)	1997	530	535
Rhynchosia	cana	1223	Ohri, 1996 (Ref. 303)	1997	530	535
Rhynchosia	rothii	1223	Ohri, 1996 (Ref. 303)	1997	530	535
Rhynchosia	minima	1225	Ohri and Singh, 2002 (Ref. 443)	2005a	530	535
Rhynchosia	hirta	2714	Ohri, 1996 (Ref. 303)	1997	530	535
Rhynchosia	cyanosperma	2721	Ohri and Singh, 2002 (Ref. 443)	2005a	530	535	1224	1717
Robinia	pseudoacacia	636	Olszewska and Osiecka, 1984 (Ref. 157)	1991	536	536	636	636
Saraca	indica	1956	Ohri and Kumar, 1986 (Ref. 185)	1995	537	537	1956	1956
Scorpiurus	vermiculatus	391	Bennett and Smith, 1987 (Ref. 164)	1995	538	538	391	391
Senna	artemisioides	1208	Morgan & Westoby, 2005 (Ref. 526)	2011	539	539	1208	1208
Sesbania	rostrata	1198	Arumuganathan and Earle, 1991 (Ref. 227)	1995	540	540	1198	1198
Sophora	japonica	655	Barow & Meister, 2003 (Ref. 492)	2011	541	542
Sophora	mollis	1995	Ohri et al., 2004 (Ref. 501)	2011	541	542	1325	1325
Spartocytisus	supranubius	1090	Suda et al., 2005 (Ref. 552)	2011	543	544
Spartocytisus	filipes	1125	Suda et al., 2005 (Ref. 552)	2011	543	544	1107.5	1108
Tamarindus	indica	819	Ohri, 2002 (Ref. 454)	2005a	545	545	819	819
Teline	stenopetala	998	Suda et al., 2005 (Ref. 552)	2011	546	549
Teline	osyroides	1007	Suda et al., 2005 (Ref. 552)	2011	546	549
Teline	pallida	1115	Suda et al., 2005 (Ref. 552)	2011	546	549
Teline	canariensis	1467	Suda et al., 2003 (Ref. 477)	2011	546	549	1061	1147
Tephrosia	strigosa	636	Raina et al., 1986 (Ref. 183)	1995	550	570
Tephrosia	leptostachya	1002	Raina et al., 1986 (Ref. 183)	1995	550	570
Tephrosia	noctiflora	1198	Raina et al., 1986 (Ref. 183)	1995	550	570
Tephrosia	polystachya	1223	Raina et al., 1986 (Ref. 183)	1995	550	570
Tephrosia	oxygona	1247	Raina et al., 1986 (Ref. 183)	1995	550	570
Tephrosia	villosa	1247	Raina et al., 1986 (Ref. 183)	1995	550	570
Tephrosia	incana	1296	Raina et al., 1986 (Ref. 183)	1995	550	570
Tephrosia	subtriflora	1320	Raina et al., 1986 (Ref. 183)	1995	550	570
Tephrosia	multiflora	1369	Raina et al., 1986 (Ref. 183)	1995	550	570
Tephrosia	purpurea	1418	Raina et al., 1986 (Ref. 183)	1995	550	570
Tephrosia	uniflora	1418	Raina et al., 1986 (Ref. 183)	1995	550	570
Tephrosia	wallichii	1614	Raina et al., 1986 (Ref. 183)	1995	550	570
Tephrosia	hamiltonii	1663	Raina et al., 1986 (Ref. 183)	1995	550	570
Tephrosia	apollinea	1785	Raina et al., 1986 (Ref. 183)	1995	550	570
Tephrosia	virginiana	1785	Raina et al., 1986 (Ref. 183)	1995	550	570
Tephrosia	falciformis	2005	Raina et al., 1986 (Ref. 183)	1995	550	570
Tephrosia	adunca	2127	Raina et al., 1986 (Ref. 183)	1995	550	570
Tephrosia	candida	2543	Raina et al., 1986 (Ref. 183)	1995	550	570
Tephrosia	purpurea	2983	Raina et al., 1986 (Ref. 183)	1995	550	570
Tephrosia	vogellii	3447	Raina et al., 1986 (Ref. 183)	1995	550	570
Tephrosia	pumila	3643	Raina et al., 1986 (Ref. 183)	1995	550	570	1418	1760
Trifolium	ligusticum	336	Vizintin et al., 2006 (Ref. 534)	2011	571	610
Trifolium	lappaceum	342	Vizintin et al., 2006 (Ref. 534)	2011	571	610
Trifolium	variegatum	351	Vizintin et al., 2006 (Ref. 534)	2011	571	610
Trifolium	campestre	363	Vizintin et al., 2006 (Ref. 534)	2011	571	610
Trifolium	aureum	370	Vizintin et al., 2006 (Ref. 534)	2011	571	610
Trifolium	striatum	372	Vizintin et al., 2006 (Ref. 534)	2011	571	610
Trifolium	arvense	377	Vizintin et al., 2006 (Ref. 534)	2011	571	610
Trifolium	glomeratum	383	Vizintin et al., 2006 (Ref. 534)	2011	571	610
Trifolium	nigrescens	385	Vizintin et al., 2006 (Ref. 534)	2011	571	610
Trifolium	pratense	418	Vizintin et al., 2006 (Ref. 534)	2011	571	610
Trifolium	willdenovii	433	Vizintin et al., 2006 (Ref. 534)	2011	571	610
Trifolium	resupinatum	508	Vizintin et al., 2006 (Ref. 534)	2011	571	610
Trifolium	tomentosum	508	Vizintin et al., 2006 (Ref. 534)	2011	571	610
Trifolium	fragiferum	525	Vizintin et al., 2006 (Ref. 534)	2011	571	610
Trifolium	decorum	538	Akmal, 1989 (Ref. 269-F)	1995	571	610
Trifolium	alexandrinum	542	Vizintin et al., 2006 (Ref. 534)	2011	571	610
Trifolium	subterraneum	543	Vizintin et al., 2006 (Ref. 534)	2011	571	610
Trifolium	hybridum	608	Vizintin et al., 2006 (Ref. 534)	2011	571	610
Trifolium	michelianum	640	Vizintin et al., 2006 (Ref. 534)	2011	571	610
Trifolium	incarnatum	652	Vizintin et al., 2006 (Ref. 534)	2011	571	610
Trifolium	vesiculosum	663	Vizintin et al., 2006 (Ref. 534)	2011	571	610
Trifolium	hirtum	669	Vizintin et al., 2006 (Ref. 534)	2011	571	610
Trifolium	dubium	714	Vizintin et al., 2006 (Ref. 534)	2011	571	610
Trifolium	tembense	734	Akmal, 1989 (Ref. 269-F)	1995	571	610
Trifolium	alpestre	763	Siljak-Yakovlev et al., 2010 (Ref. 634)	2012	571	610
Trifolium	bilineatum	929	Akmal, 1989 (Ref. 269-F)	1995	571	610
Trifolium	quartinianum	929	Akmal, 1989 (Ref. 269-F)	1995	571	610
Trifolium	steudneri	929	Akmal, 1989 (Ref. 269-F)	1995	571	610
Trifolium	uniflorum	929	Akmal, 1989 (Ref. 269-F)	1995	571	610
Trifolium	polymorphum	1002	Vizintin et al., 2006 (Ref. 534)	2011	571	610
Trifolium	repens	1093	Vizintin et al., 2006 (Ref. 534)	2011	571	610
Trifolium	simense	1223	Akmal, 1989 (Ref. 269-F)	1995	571	610
Trifolium	rueppellianum	1484	Vizintin et al., 2006 (Ref. 534)	2011	571	610
Trifolium	hybridum	1516	Kuriyan, 1984 (Ref. 126)	1991	571	610
Trifolium	semipilosum	1917	Vizintin et al., 2006 (Ref. 534)	2011	571	610
Trifolium	ambiguum	2242	Vizintin et al., 2006 (Ref. 534)	2011	571	610
Trifolium	africanum	2245	Vizintin et al., 2006 (Ref. 534)	2011	571	610
Trifolium	medium	3154	Vizintin et al., 2006 (Ref. 534)	2011	571	610
Trifolium	burchellianum	3606	Vizintin et al., 2006 (Ref. 534)	2011	571	610
Trifolium	pannonicum	5658	Siljak-Yakovlev et al., 2010 (Ref. 634)	2012	571	610	657.5	1040
Trigonella	stellata	685	Bidak and Brandham, 1995 (Ref. 282)	1997	611	611	685	685
Ulex	gallii	2836	Band, 1984 (Ref. 154)	1991	612	613
Ulex	europaeus	3765	Misset and Gourret, 1996 (Ref. 284)	1997	612	613	3300.5	3301
Vicia	lunata	1785	Maxted et al., 1991 (Ref. 190)	1995	614	701
Vicia	monantha	1883	Raina and Rees, 1983 (Ref. 112)	1991	614	701
Vicia	cordata	1932	Raina and Bisht, 1988 (Ref. 189)	1995	614	701
Vicia	picta	2005	Rees et al., 1966 (Ref. 20)	1976	614	701
Vicia	dasycarpa	2152	Raina and Rees, 1983 (Ref. 112)	1991	614	701
Vicia	amphicarpa	2176	Martin and Shanks, 1966 (Ref. 19)	1976	614	701
Vicia	angustifolia	2201	Rees et al., 1966 (Ref. 20)	1976	614	701
Vicia	eriocarpa	2201	Raina and Rees, 1983 (Ref. 112)	1991	614	701
Vicia	sativa	2201	Rees et al., 1966 (Ref. 20)	1976	614	701
Vicia	villosa	2225	Chooi WY., 1971 (Ref. 21)	1976	614	701
Vicia	disperma	2347	Callimassia and Bennett, 1992 (Ref. 269-H)	1995	614	701
Vicia	pilosa	2347	Raina and Rees, 1983 (Ref. 112)	1991	614	701
Vicia	atropurpurea	2372	Chooi WY., 1971 (Ref. 21)	1976	614	701
Vicia	palaestina	2494	Raina and Bisht, 1988 (Ref. 189)	1995	614	701
Vicia	lathyroides	2567	Chooi WY., 1971 (Ref. 21)	1976	614	701
Vicia	pubescens	2567	Chooi WY., 1971 (Ref. 21)	1976	614	701
Vicia	macrocarpa	2641	Raina and Rees, 1983 (Ref. 112)	1991	614	701
Vicia	cirrhosa	2822	Suda et al., 2005 (Ref. 552)	2011	614	701
Vicia	scandens	2841	Suda et al., 2005 (Ref. 552)	2011	614	701
Vicia	biennis	2910	Chooi WY., 1971 (Ref. 21)	1976	614	701
Vicia	ochroleuca	2934	Siljak-Yakovlev et al., 2010 (Ref. 634)	2012	614	701
Vicia	canescens	3051	Akpinar et al., 1997 (Ref. 409)	2005a	614	701
Vicia	grandiflora	3276	Chooi WY., 1971 (Ref. 21)	1976	614	701
Vicia	benghalensis	3399	Raina and Rees, 1983 (Ref. 112)	1991	614	701
Vicia	qatmensis	3423	Maxted et al., 1991 (Ref. 190)	1995	614	701
Vicia	tetrasperma	3521	Raina and Bisht, 1988 (Ref. 189)	1995	614	701
Vicia	barbazitae	3545	Maxted et al., 1991 (Ref. 190)	1995	614	701
Vicia	hirsuta	3888	Callimassia and Bennett, 1992 (Ref. 269-H)	1995	614	701
Vicia	elegans	3985	Raina and Rees, 1983 (Ref. 112)	1991	614	701
Vicia	incana	4010	Raina and Rees, 1983 (Ref. 112)	1991	614	701
Vicia	cassubica	4034	Chooi WY., 1971 (Ref. 21)	1976	614	701
Vicia	dalmatica	4034	Raina and Bisht, 1988 (Ref. 189)	1995	614	701
Vicia	epetiolaris	4059	Naranjo et al., 1998 (Ref. 415)	2005a	614	701
Vicia	pyrenaica	4059	Raina and Rees, 1983 (Ref. 112)	1991	614	701
Vicia	ervilia	4108	Raina and Rees, 1983 (Ref. 112)	1991	614	701
Vicia	ludoviciana	4157	Raina and Rees, 1983 (Ref. 112)	1991	614	701
Vicia	galeata	4205	Chooi WY., 1971 (Ref. 21)	1976	614	701
Vicia	incisaeformis	4230	Raina and Rees, 1983 (Ref. 112)	1991	614	701
Vicia	vicioides	4230	Raina and Rees, 1983 (Ref. 112)	1991	614	701
Vicia	nana	4367	Naranjo et al., 1998 (Ref. 415)	2005a	614	701
Vicia	bithynica	4474	Chooi WY., 1971 (Ref. 21)	1976	614	701
Vicia	cuspidata	4523	Maxted et al., 1991 (Ref. 190)	1995	614	701
Vicia	ramuliflora	4572	Chooi WY., 1971 (Ref. 21)	1976	614	701
Vicia	sepium	4572	Raina and Bisht, 1988 (Ref. 189)	1995	614	701
Vicia	neglecta	4621	Chooi WY., 1971 (Ref. 21)	1976	614	701
Vicia	tenuifolia	4621	Chooi WY., 1971 (Ref. 21)	1976	614	701
Vicia	pampicola	4631	Naranjo et al., 1998 (Ref. 415)	2005a	614	701
Vicia	unijuga	4719	Chooi WY., 1971 (Ref. 21)	1976	614	701
Vicia	alpestris	4963	Callimassia and Bennett, 1992 (Ref. 269-H)	1995	614	701
Vicia	graminea	5061	Chooi WY., 1971 (Ref. 21)	1976	614	701
Vicia	cracca	5183	Chooi WY., 1971 (Ref. 21)	1976	614	701
Vicia	orobus	5183	Raina and Rees, 1983 (Ref. 112)	1991	614	701
Vicia	cappadocica	5379	Maxted et al., 1991 (Ref. 190)	1995	614	701
Vicia	amurensis	5526	Raina and Rees, 1983 (Ref. 112)	1991	614	701
Vicia	pseudorobus	5648	Raina and Rees, 1983 (Ref. 112)	1991	614	701
Vicia	cracca	5785	Akpinar et al., 1997 (Ref. 409)	2005a	614	701
Vicia	macrograminea	5809	Naranjo et al., 1998 (Ref. 415)	2005a	614	701
Vicia	articulata	5892	Chooi WY., 1971 (Ref. 21)	1976	614	701
Vicia	meyeri	6113	Chooi WY., 1971 (Ref. 21)	1976	614	701
Vicia	amoena	6235	Li and Liu, 1996 (Ref. 312)	2000	614	701
Vicia	galilaea	6379	Cremonini et al., 1992 (Ref. 408)	2005a	614	701
Vicia	assyriaca	6430	Maxted et al., 1991 (Ref. 190)	1995	614	701
Vicia	tigridis	6455	Maxted et al., 1991 (Ref. 190)	1995	614	701
Vicia	pisiformis	6504	Chooi WY., 1971 (Ref. 21)	1976	614	701
Vicia	hyrcanica	6602	Chooi WY., 1971 (Ref. 21)	1976	614	701
Vicia	pannonica	6602	Raina and Rees, 1983 (Ref. 112)	1991	614	701
Vicia	hybrida	6626	Martin and Shanks, 1966 (Ref. 19)	1976	614	701
Vicia	dionysiensis	6748	Maxted et al., 1991 (Ref. 190)	1995	614	701
Vicia	johannis	6919	Raina and Rees, 1983 (Ref. 112)	1991	614	701
Vicia	narbonensis	7115	Chooi WY., 1971 (Ref. 21)	1976	614	701
Vicia	lutea	7237	Chooi WY., 1971 (Ref. 21)	1976	614	701
Vicia	dumetorum	7262	Chooi WY., 1971 (Ref. 21)	1976	614	701
Vicia	hajastana	7335	Chooi WY., 1971 (Ref. 21)	1976	614	701
Vicia	mollis	7531	Maxted et al., 1991 (Ref. 190)	1995	614	701
Vicia	serratifolia	7653	Raina and Rees, 1983 (Ref. 112)	1991	614	701
Vicia	hyaeniscyamus	7726	Maxted et al., 1991 (Ref. 190)	1995	614	701
Vicia	sylvatica	7897	Raina and Rees, 1983 (Ref. 112)	1991	614	701
Vicia	michauxii	8117	Chooi WY., 1971 (Ref. 21)	1976	614	701
Vicia	amoena	8411	Li and Liu, 1996 (Ref. 312)	2000	614	701
Vicia	eristalioides	8582	Maxted et al., 1991 (Ref. 190)	1995	614	701
Vicia	kalakhensis	8973	Maxted et al., 1991 (Ref. 190)	1995	614	701
Vicia	peregrina	9267	Chooi WY., 1971 (Ref. 21)	1976	614	701
Vicia	melanops	9780	Raina and Rees, 1983 (Ref. 112)	1991	614	701
Vicia	ramuliflora	12470	Li and Liu, 1996 (Ref. 312)	2000	614	701
Vicia	noeana	12787	Maxted et al., 1991 (Ref. 190)	1995	614	701
Vicia	faba	13032	Bennett and Smith, 1976 (Ref. 2)	1976	614	701
Vicia	unijuga	15868	Li and Liu, 1996 (Ref. 312)	2000	614	701
Vicia	faba	26797	Bennett MD, Smith JB, Heslop-Harrison, 1982 (Ref. 55)	1982	614	701	4596.5	5452
Vigna	lancifolia	416	Parida et al., 1990 (Ref. 166)	1995	702	723
Vigna	ambacensis	465	Parida et al., 1990 (Ref. 166)	1995	702	723
Vigna	sublobata	465	Ignacimuthu and Babu, 1988 (Ref. 220)	1995	702	723
Vigna	oblongifolia	489	Parida et al., 1990 (Ref. 166)	1995	702	723
Vigna	radiata	513	Bennett MD, Smith JB, Heslop-Harrison, 1982 (Ref. 55)	1982	702	723
Vigna	trilobata	513	Parida et al., 1990 (Ref. 166)	1995	702	723
Vigna	angularis	538	Parida et al., 1990 (Ref. 166)	1995	702	723
Vigna	mungo	538	Ignacimuthu and Babu, 1988 (Ref. 220)	1995	702	723
Vigna	repens	538	Parida et al., 1990 (Ref. 166)	1995	702	723
Vigna	sinensis	538	Bennett and Smith, 1976 (Ref. 2)	1976	702	723
Vigna	caracalla	562	Parida et al., 1990 (Ref. 166)	1995	702	723
Vigna	umbellata	562	Parida et al., 1990 (Ref. 166)	1995	702	723
Vigna	vexillata	562	Parida et al., 1990 (Ref. 166)	1995	702	723
Vigna	parvifolia	587	Parida et al., 1990 (Ref. 166)	1995	702	723
Vigna	unguiculata	587	Parida et al., 1990 (Ref. 166)	1995	702	723
Vigna	subterranea	880	Lakhanpaul and Babu, 1991 (Ref. 279)	1997	702	723
Vigna	glabrescens	978	Parida et al., 1990 (Ref. 166)	1995	702	723
Vigna	minima	1027	Lakhanpaul and Babu, 1991 (Ref. 279)	1997	702	723
Vigna	aconitifolia	1100	Lakhanpaul and Babu, 1991 (Ref. 279)	1997	702	723
Vigna	dalzelliana	1100	Lakhanpaul and Babu, 1991 (Ref. 279)	1997	702	723
Vigna	luteola	1369	Lakhanpaul and Babu, 1991 (Ref. 279)	1997	702	723
Vigna	hainiana	1394	Lakhanpaul and Babu, 1991 (Ref. 279)	1997	702	723	562	715

## Sheet: by genus
Genus	Species	1C (Mbp)	Original Reference	Paper	START	END	median	average		Overall
Lablab	niger	367	Bennett and Smith, 1976 (Ref. 2)	1976	243	243	367	367		average	1411.87
Cercis	canadensis	367	Roberts & Werner (2016)					367		median	1153
Scorpiurus	vermiculatus	391	Bennett and Smith, 1987 (Ref. 164)	1995	538	538	391	391
Inga	dulcis	401	Ohri, 2002 (Ref. 454)	2005a	242	242	401	401
Biserrula	pectinatus	416	Bennett and Smith, 1987 (Ref. 164)	1995	114	114	416	416
Bituminaria	bituminosa	488	Walker et al., 2006 (Ref. 513)	2011	115	115	488	488
Butea	monosperma	548	Ohri et al., 2004 (Ref. 501)	2011	116	116	548	548
Castanospermum	australe	553	Ohri, 2002 (Ref. 454)	2005a	145	145	553	553
Anthyllis	montana	655	Siljak-Yakovlev et al., 2010 (Ref. 634)	2012	77	78	560	560
Lonchocarpus	xuul	709	Palomino and Sousa, 2000 (Ref. 327)	2000	324	369	587	586
Bauhinia	monandra	699	Ohri et al., 2004 (Ref. 501)	2011	108	113	615	623
Mimosa	invisa	660	Bennett et al., 1998 (Ref. 375)	2000	457	458	623.5	624
Prosopis	juliflora	1663	Ohri, 1996 (Ref. 301)	1997	509	520	416	628
Ceratonia	siliqua	636	Ouarda et al., 2008 (Ref. 654)	2012	146	146	636	636
Colutea	arborescens	636	Olszewska and Osiecka, 1984 (Ref. 157)	1991	158	158	636	636
Robinia	pseudoacacia	636	Olszewska and Osiecka, 1984 (Ref. 157)	1991	536	536	636	636
Adenanthera	microsperma	680	Ohri, 2002 (Ref. 454)	2005a	71	72	672.5	673
Trigonella	stellata	685	Bidak and Brandham, 1995 (Ref. 282)	1997	611	611	685	685
Parkinsonia	aculeata	709	Ohri, 1996 (Ref. 301)	1997	463	463	709	709
Vigna	hainiana	1394	Lakhanpaul and Babu, 1991 (Ref. 279)	1997	702	723	562	715
Phaseolus	dumosus	1858	Ayonoadu, 1974 (Ref. 28)	1976	466	501	652.5	756
Lupinus	albicaulis	1311	Naganowska et al., 2006 (Ref. 524)	2011	396	443	714	760
Leucaena	confertiflora	1614	Palomino et al., 1995 (Ref. 278)	1997	300	323	699	772
Peltophorum	pterocarpum	775	Ohri, 2002 (Ref. 454)	2005a	464	464	775	775
Psophocarpus	tetragonolobus	782	Bennett and Smith, 1976 (Ref. 2)	1976	521	521	782	782
Lotus	cytisoides	1369	Borsos, 1973 (Ref. 51)	1976	370	395	601.5	785
Tamarindus	indica	819	Ohri, 2002 (Ref. 454)	2005a	545	545	819	819
Adenocarpus	foliolosus	875	Suda et al., 2005 (Ref. 552)	2011	73	74	850.5	851
Cassia	angustifolia	1760	Bahl and Srivastava, 1987 (Ref. 236)	1995	132	144	709	852
Astragalus	vesicarius	1120	Siljak-Yakovlev et al., 2010 (Ref. 634)	2012	105	107	734	854
Phyllota	phylicoides	914	Morgan & Westoby, 2005 (Ref. 526)	2011	502	502	914	914
Olneya	tesota	958	Sliwinska et al., 2009 (Ref. 624)	2012	459	459	958	958
Petteria	ramentacea	973	Siljak-Yakovlev et al., 2010 (Ref. 634)	2012	465	465	973	973
Gleditsia	sinensis	1027	Ohri and Kumar, 1986 (Ref. 185)	1995	217	218	978	978
Trifolium	pannonicum	5658	Siljak-Yakovlev et al., 2010 (Ref. 634)	2012	571	610	657.5	1040
Dorycnium	eriophtalmum	1095	Suda et al., 2003 (Ref. 477)	2011	190	191	1051	1051
Pueraria	lobata	1076	Price, 1999 (Ref. 347)	2000	523	523	1076	1076
Spartocytisus	filipes	1125	Suda et al., 2005 (Ref. 552)	2011	543	544	1107.5	1108
Crotalaria	incana	1638	Gupta, 1976 (Ref. 65)	1982	160	172	1100	1132
Retama	raetam	1795	Benmiloud-Mahieddine et al., 2011 (Ref. 671)	2012	526	529	926.5	1132
Teline	canariensis	1467	Suda et al., 2003 (Ref. 477)	2011	546	549	1061	1147
Dunbaria	ferruginea	1149	Ohri, 1996 (Ref. 303)	1997	192	192	1149	1149
Medicago	glutinosa	1907	Bennett, 1972 (Ref. 1)	1976	444	451	868	1157
Cytisus	ciliatus	2024	Siljak-Yakovlev et al., 2010 (Ref. 634)	2012	173	179	944	1166
Cicer	songaricum	1325	Ohri, 1999 (Ref. 435)	2005a	150	157	1247	1180
Albizzia	lucida	1247	Ohri, 1996 (Ref. 301)	1997	75	76	1186	1186
Coronilla	emerus	1188	Siljak-Yakovlev et al., 2010 (Ref. 634)	2012	159	159	1188	1188
Acacia	simsii	2054	Mukherjee and Sharma, 1995 (Ref. 364)	2000	2	70	1237	1193
Melilotus	alba	1296	Kenton and Bennett, 1990 (Ref. 269-G)	1995	452	454	1198	1198
Sesbania	rostrata	1198	Arumuganathan and Earle, 1991 (Ref. 227)	1995	540	540	1198	1198
Senna	artemisioides	1208	Morgan & Westoby, 2005 (Ref. 526)	2011	539	539	1208	1208
Onobrychis	viciifolia	1223	Hayot C., 2010 (Ref. 656)	2012	460	460	1223	1223
Genista	benehoavensis	2249	Suda et al., 2005 (Ref. 552)	2011	211	216	1027	1288
Glycine	tomentella	2078	Hammatt et al., 1991 (Ref. 165)	1995	219	234	1174	1288
Laburnum	alpinum	1858	Olszewska and Osiecka, 1984 (Ref. 157)	1991	244	245	1320	1320
Sophora	mollis	1995	Ohri et al., 2004 (Ref. 501)	2011	541	542	1325	1325
Erythrina	resupinata	1731	Ohri et al., 2004 (Ref. 501)	2011	193	205	1377	1372
Archidendron	monadelphum	1467	Ohri, 2002 (Ref. 454)	2005a	102	102	1467	1467
Paracalyx	scariosa	1467	Ohri, 1996 (Ref. 303)	1997	462	462	1467	1467
Caesalpinia	mexicana	1958	Ohri et al., 2004 (Ref. 501)	2011	117	119	1760	1516
Cajanus	acutifolius	2861	Ohri, 1996 (Ref. 303)	1997	120	130	1411	1536
Caragana	arborescens	1565	Olszewska and Osiecka, 1984 (Ref. 157)	1991	131	131	1565	1565
Eutaxia	microphylla	1584	Morgan & Westoby, 2005 (Ref. 526)	2011	206	206	1584	1584
Flemingia	macrophylla	1736	Ohri, 1996 (Ref. 303)	1997	207	209	1567	1590
Pultenaea	flexilis	2518	Morgan & Westoby, 2005 (Ref. 526)	2011	524	525	1608.5	1609
Rhynchosia	cyanosperma	2721	Ohri and Singh, 2002 (Ref. 443)	2005a	530	535	1224	1717
Dalbergia	horrida	1924	Hiramath et al., 2001 (Ref. 445)	2005a	180	189	1780	1726
Pongamia	glabra	1760	Ohri and Kumar, 1986 (Ref. 185)	1995	508	508	1760	1760
Tephrosia	pumila	3643	Raina et al., 1986 (Ref. 183)	1995	550	570	1418	1760
Millettia	ovalifolia	1956	Ohri and Kumar, 1986 (Ref. 185)	1995	455	456	1843.5	1844
Hippocrepis	comosa	1861	Vidic et al., 2009 (Ref. 628)	2012	241	241	1861	1861
Argyrolobium	zanonii	2024	Siljak-Yakovlev et al., 2010 (Ref. 634)	2012	103	104	1868	1868
Saraca	indica	1956	Ohri and Kumar, 1986 (Ref. 185)	1995	537	537	1956	1956
Chamaecytisus	spinescens	3120	Siljak-Yakovlev et al., 2010 (Ref. 634)	2012	147	149	2000	2113
Galega	officinalis	2161	Kubesová et al., 2010 (Ref. 630)	2012	210	210	2161	2161
Pterospartum	tridentatum	2269	Loureiro et al., 2007 (Ref. 563)	2011	522	522	2269	2269
Hedysarum	rotundifolium	3301	Akpinar and Yildiz, 1999 (Ref. 363)	2000	235	240	2665.5	2678
Arachis	glabrata	5697	Singh et al., 1996 (Ref. 297)	1997	79	101	2910	2769
Ulex	europaeus	3765	Misset and Gourret, 1996 (Ref. 284)	1997	612	613	3300.5	3301
Lens	esculenta	4499	Bennett and Smith, 1976 (Ref. 2)	1976	298	299	4303.5	4304
Oxytropis	halleri	4509	Siljak-Yakovlev et al., 2010 (Ref. 634)	2012	461	461	4509	4509
Pisum	sativum	4768	Bennett and Smith, 1976 (Ref. 2)	1976	503	507	4597	4528
Vicia	faba	26797	Bennett MD, Smith JB, Heslop-Harrison, 1982 (Ref. 55)	1982	614	701	4596.5	5452
Lathyrus	vestitus	14279	Narayan, 1982 (Ref. 113)	1991	246	297	6797	7291
